# Supplementary material for: Heart Ferroportin Protein Content Is Regulated by Heart Iron Concentration and Systemic Hepcidin Expression
Source: Int J Mol Sci. 2022 May 24;23(11):5899. doi: 10.3390/ijms23115899 (PMC9180074; doi:10.3390/ijms23115899)
Supplement: Supplementary file 1 [file ijms-23-05899-s001.zip › Table S1.pdf]

## List of primers used for PCR

### Mouse:

|                     |                       |
|---------------------|-----------------------|
| <i>Actb</i> Forward | GCTACAGCTTCACCACCACA  |
| <i>Actb</i> Reverse | GGTCTTTACGGATGTCAACG  |
| <i>Hamp</i> Forward | CTGAGCAGCACCACTATCTC  |
| <i>Hamp</i> Reverse | TGGCTCTAGGCTATGTTTTGC |
| <i>Fpn</i> Forward  | ATCGGTCTTTGGTCCTTTGAT |
| <i>Fpn</i> Reverse  | ATTGCCACAAAGGAGACTGAA |

### Rat:

|                     |                        |
|---------------------|------------------------|
| <i>Actb</i> Forward | TGTCACCAACTGGGACGATA   |
| <i>Actb</i> Reverse | AACACAGCCTGGATGGCTAC   |
| <i>Hamp</i> Forward | GAAGGCAAGATGGCACTAAGCA |
| <i>Hamp</i> Reverse | TCTCGTCTGTTGCCGGAGATAG |
| <i>Fpn</i> Forward  | ATCGGTCTTTGGTCCTTTGAT  |
| <i>Fpn</i> Reverse  | ATTGCCACAAAGGAGACTGAA  |
